# Supplementary material for: A long-term (2005–2019) eddy covariance data set of CO 2 and H 2 O fluxes from the Tibetan alpine steppe
Source: Copernicus journal article supplement (doi:10.5194/essd-12-2705-2020), 2020-11-11
Supplement: Supplementary file [file essd-12-2705-2020-supplement-title-page.pdf › essd-12-2705-2020-supplement-title-page.pdf]

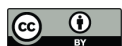

## *Supplement of*

# **A long-term (2005–2019) eddy covariance data set of CO<sub>2</sub> and H<sub>2</sub>O fluxes from the Tibetan alpine steppe**

**Felix Nieberding et al.**

*Correspondence to:* Felix Nieberding (f.nieberding@tu-braunschweig.de) and Yaoming Ma (ymma@itpcas.ac.cn)

- `essd-12-2705-2020-supplement-title-page.pdf`
- supplementary material
  - `1_import.R`
  - `2_SSH.R`
  - `3_gap_filling.R`
  - `4_plots.R`
  - `5_export.R`

The copyright of individual parts of the supplement might differ from the CC BY 4.0 License.
